# Supplementary material for: Persistent variations in national asthma mortality, hospital admissions and prevalence by socioeconomic status and region in England
Source: PubMed Central journal article supplement (PMC6204968; doi:10.1136/thoraxjnl-2017-210714), 2018-05-14

ONLINE SUPPLEMENT

**Table 1. Effect of IMD quintile on prevalence of asthma outcomes (Incidence Rate Ratios), adjusting for age, sex and smoking cigarettes<sup>1</sup>, stratified by broad age band. England 2010: (a) prevalence of clinician-diagnosed and treated asthma in the last 12 months (b) prevalence of recent severe asthma symptoms in the last 12 months<sup>2</sup>.**

| (a) Diagnosis                     |   | 5-44 years                     |        |           |      | 45-74 years                    |        |        |      | 75 years and over              |      |        |      |
|-----------------------------------|---|--------------------------------|--------|-----------|------|--------------------------------|--------|--------|------|--------------------------------|------|--------|------|
| IMD                               |   | N diagnosed                    | IRR    | 95% CI    |      | N diagnosed                    | IRR    | 95% CI |      | N diagnosed                    | IRR  | 95% CI |      |
| Least deprived                    | 1 | 123                            | 1.00   | Reference |      | 56                             | 1.00   |        |      | 14                             | 1.00 |        |      |
|                                   | 2 | 136                            | 1.14   | 0.79      | 1.65 | 59                             | 1.40   | 0.99   | 1.97 | 16                             | 1.06 | 0.54   | 2.05 |
|                                   | 3 | 147                            | 1.29   | 0.91      | 1.83 | 66                             | 1.52   | 1.08   | 2.14 | 13                             | 1.13 | 0.57   | 2.24 |
|                                   | 4 | 157                            | 1.10   | 0.77      | 1.58 | 87                             | 1.91   | 1.38   | 2.64 | 18                             | 1.94 | 1.04   | 3.61 |
|                                   | 5 | 184                            | 1.36   | 0.97      | 1.90 | 70                             | 2.03   | 1.45   | 2.84 | 10                             | 1.28 | 0.62   | 2.65 |
| Linear trend for IMD<br>(p-value) |   |                                | 1.06   | 0.98      | 1.14 |                                | 1.19   | 1.10   | 1.28 |                                | 1.13 | 0.97   | 1.32 |
|                                   |   |                                | 0.13   |           |      |                                | <0.001 |        |      |                                | 0.11 |        |      |
| (b) Symptoms                      |   | 5-44 years                     |        |           |      | 45-74 years                    |        |        |      | 75 years and over              |      |        |      |
| IMD                               |   | N severe symptoms <sup>2</sup> | IRR    | 95% CI    |      | N severe symptoms <sup>2</sup> | IRR    | 95% CI |      | N severe symptoms <sup>2</sup> | IRR  | 95% CI |      |
| Least deprived                    | 1 | 47                             | 1.00   | Reference |      | 36                             | 1.00   |        |      | 14                             | 1.00 |        |      |
|                                   | 2 | 59                             | 1.14   | 0.64      | 2.02 | 37                             | 1.34   | 0.87   | 2.06 | 14                             | 0.98 | 0.51   | 1.88 |
|                                   | 3 | 71                             | 1.75   | 1.05      | 2.92 | 53                             | 1.79   | 1.19   | 2.68 | 11                             | 0.85 | 0.41   | 1.73 |
|                                   | 4 | 94                             | 1.78   | 1.07      | 2.95 | 65                             | 2.17   | 1.47   | 3.21 | 20                             | 1.99 | 1.09   | 3.63 |
|                                   | 5 | 113                            | 2.22   | 1.37      | 3.60 | 79                             | 3.50   | 2.40   | 5.08 | 8                              | 1.02 | 0.48   | 2.17 |
| Linear trend for IMD<br>(p-value) |   |                                | 1.22   | 1.10      | 1.35 |                                | 1.36   | 1.25   | 1.48 |                                | 1.11 | 0.95   | 1.29 |
|                                   |   |                                | <0.001 |           |      |                                | <0.001 |        |      |                                | 0.2  |        |      |

1 Currently smoking or ever smoked cigarettes compared with never smoked cigarettes.

2 Frequent symptoms, interference with normal activities or sleep disturbance in the last year.

**Table 2. Regional variation (Incidence Rate Ratios), adjusted for age and sex: mortality (England 2002-2015), admissions (England 2008-2012), treated asthma (England 2010), severe asthma (England 2010)**

| Government Office Region of England | Mortality |           |        |      | Emergency admissions |           |        |      | Treated asthma |           |        |      | Severe asthma |           |        |      |
|-------------------------------------|-----------|-----------|--------|------|----------------------|-----------|--------|------|----------------|-----------|--------|------|---------------|-----------|--------|------|
|                                     | N         | IRR       | 95% CI |      | N                    | IRR       | 95% CI |      | N              | IRR       | 95% CI |      | N             | IRR       | 95% CI |      |
| South East                          | 2,555     | Reference |        |      | 39,961               | Reference |        |      | 201            | Reference |        |      | 140           | Reference |        |      |
| North East                          | 675       | 0.88      | 0.81   | 0.96 | 17,338               | 1.45      | 1.42   | 1.47 | 118            | 1.23      | 0.98   | 1.55 | 101           | 1.49      | 1.16   | 1.93 |
| North West                          | 1,947     | 0.98      | 0.92   | 1.03 | 54,620               | 1.66      | 1.64   | 1.68 | 205            | 1.37      | 1.13   | 1.67 | 129           | 1.24      | 0.97   | 1.57 |
| Yorkshire & Humber                  | 1,583     | 1.06      | 1.00   | 1.13 | 31,968               | 1.29      | 1.27   | 1.31 | 137            | 1.25      | 1.00   | 1.55 | 95            | 1.24      | 0.96   | 1.61 |
| East Midlands                       | 1,233     | 0.95      | 0.89   | 1.02 | 22,787               | 1.09      | 1.07   | 1.10 | 136            | 1.23      | 0.99   | 1.53 | 98            | 1.27      | 0.98   | 1.64 |
| West Midlands                       | 2,026     | 1.28      | 1.20   | 1.35 | 38,564               | 1.47      | 1.45   | 1.49 | 117            | 0.99      | 0.79   | 1.25 | 93            | 1.13      | 0.87   | 1.47 |
| East of England                     | 1,609     | 0.93      | 0.87   | 0.99 | 26,001               | 0.96      | 0.95   | 0.98 | 150            | 1.20      | 0.97   | 1.48 | 82            | 0.94      | 0.71   | 1.23 |
| London                              | 1,775     | 1.05      | 0.99   | 1.12 | 48,171               | 1.21      | 1.19   | 1.22 | 120            | 0.93      | 0.74   | 1.16 | 96            | 1.09      | 0.84   | 1.41 |
| South West                          | 1,418     | 0.81      | 0.76   | 0.86 | 26,039               | 1.09      | 1.07   | 1.10 | 136            | 1.25      | 1.00   | 1.55 | 80            | 1.04      | 0.79   | 1.37 |
| Heterogeneity p-value               | <0.001    |           |        |      | <0.001               |           |        |      | 0.005          |           |        |      | 0.043         |           |        |      |

**Table 3. Correlations between SERs by English Government Office Region for asthma mortality, asthma emergency admissions, treated asthma and severe asthma.**

|                      | Mortality | Emergency admissions | Treated asthma | Severe asthma |
|----------------------|-----------|----------------------|----------------|---------------|
| Mortality            | 1         |                      |                |               |
| Emergency admissions | 0.41      | 1                    |                |               |
| Treated asthma       | -0.38     | 0.25                 | 1              |               |
| Severe asthma        | 0.05      | 0.60                 | 0.34           | 1             |

Figure 1. Time trends in asthma mortality per million in the least deprived quintile of IMD and most deprived quintile of IMD, 3-year moving average, by broad age band.

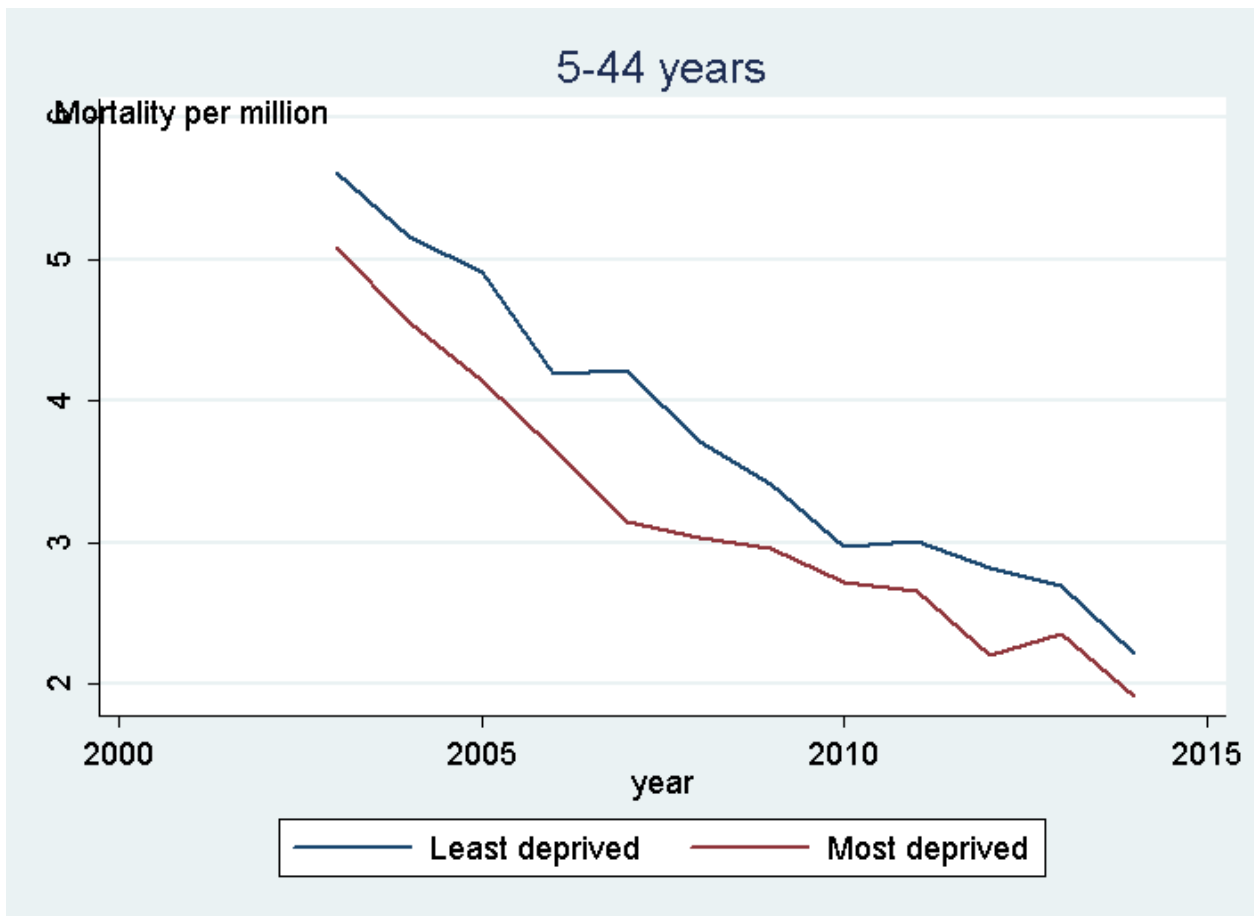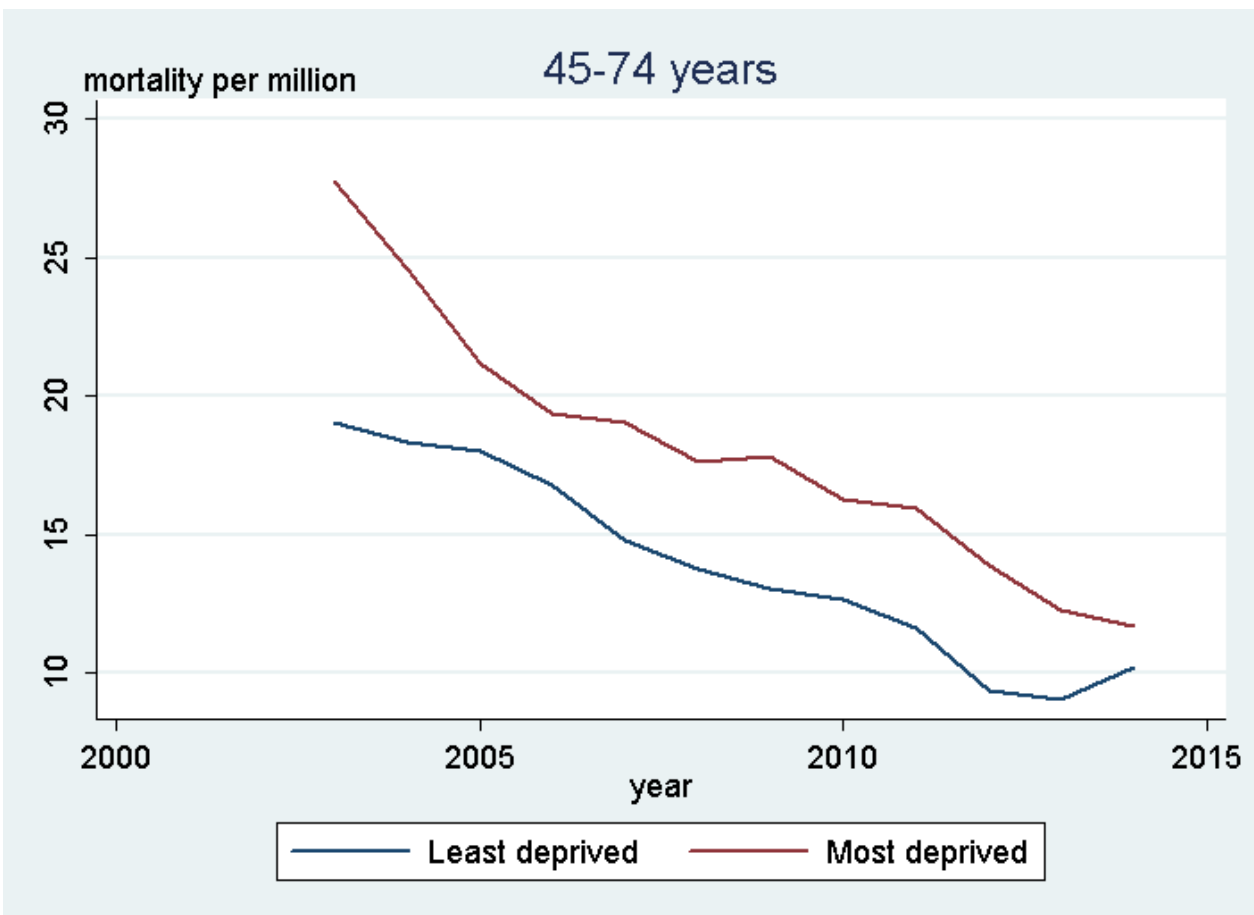

Supplement: thoraxjnl-2017-210714supp001.pdf [file thoraxjnl-2017-210714supp001.pdf]
